# Supplementary material
Source: publisher site journal article supplement (http://www.dovepress.com/get_supplementary_file.php?f=236957.docx)
Supplement: Supplementary file 1 [file get_supplementary_file.php]

**Supplementary Table 1. Comparisons of characteristics for subjects who completed or not the survey until EQ-5D-5L or specific HRQoL questionnaires**

|  | Not complete | | Complete | | p-value |
| --- | --- | --- | --- | --- | --- |
|  | N | Value | N | Value |  |
| Age (years) |  | 59.2 ± 13.4 | 408 | 55 ± 12.3 | **0.0006** |
| Body mass index (kg/m2) | 149 | 27.4 ± 5.6 | 407 | 29.3 ± 6.8 | **0.0007** |
| Gender |  |  |  |  |  |
| Men | 161 | 35 (21.7) | 408 | 83 (20.3) | 0.8622 |
| Women |  | 126 (78.3) |  | 323 (79.2) |  |
| Intersex |  | 0 (0) |  | 2 (0.5) |  |
| Marital status |  |  |  |  |  |
| Married/living with a partner | 149 | 79 (53.0) | 408 | 248 (60.8) | **0.0120** |
| Single |  | 26 (17.4) |  | 71 (17.4) |  |
| Divorced/separated |  | 30 (20.1) |  | 77 (18.9) |  |
| Widowed |  | 14 (9.4) |  | 12 (2.9) |  |
| Occupational status |  |  |  |  |  |
| Employed | 147 | 29 (19.7) | 408 | 109 (26.7) | **0.0048** |
| Student |  | 5 (3.4) |  | 8 (2.0) |  |
| Retired |  | 77 (52.4) |  | 141 (34.6) |  |
| At home |  | 7 (4.8) |  | 23 (5.6) |  |
| Unemployed |  | 4 (2.7) |  | 12 (2.9) |  |
| On sick leave, parental leave |  | 16 (10.9) |  | 57 (14.0) |  |
| Invalid |  | 9 (6.1) |  | 58 (14.2) |  |
| Education |  |  |  |  |  |
| Secondary or less | 147 | 24 (16.3) | 408 | 57 (14.0) | 0.5379 |
| Diploma of professional Studies |  | 20 (13.6) |  | 61 (15.0) |  |
| CEGEP |  | 37 (25.2) |  | 116 (28.4) |  |
| Baccalaureate |  | 49 (33.3) |  | 109 (26.7) |  |
| Master |  | 15 (10.2) |  | 53 (13.0) |  |
| Ph.D. |  | 2 (1.4) |  | 12 (2.9) |  |
| Median (IQR) | 147 | 14 (12-16) | 408 | 14 (12-16) | 0.8041 |
| Annual household income (K$ CAN), median (IQR) | 144 | 43.75 (30-75) | 408 | 52.5 (30-75) | 0.5078 |
| Living with an adult | 144 | 90 (62.5) | 408 | 275 (67.4) | 0.2853 |
| Have a child | 143 | 21 (14.7) | 408 | 66 (16.2) | 0.6739 |
| Urban area | 143 | 99 (69.2) | 408 | 290 (71.1) | 0.6764 |
| Owning a home | 139 | 90 (64.7) | 408 | 261 (64.0) | 0.8688 |
| Smoker | 118 | 17 (14.4) | 408 | 53 (13.0) | 0.6899 |
| Diagnosis given by physician |  |  |  |  |  |
| No diagnosis | 115 | 6 (5.2) | 408 | 15 (3.7) | 0.4572 |
| Herniated lumbar disk | 115 | 38 (33.0) | 408 | 157 (38.5) | 0.2869 |
| Facet osteoarthritis | 115 | 39 (33.9) | 408 | 145 (35.5) | 0.7470 |
| Fibromyalgia | 115 | 33 (28.7) | 408 | 148 (36.3) | 0.1313 |
| Sciatica | 115 | 27 (23.5) | 408 | 106 (26) | 0.5863 |
| Degenerative disk disease | 115 | 20 (17.4) | 408 | 78 (19.1) | 0.6752 |
| Spinal osteoarthritis or spondyloarthrosis | 115 | 17 (14.8) | 408 | 66 (16.2) | 0.7179 |
| Deformations (e.g. scoliosis or kyphosis) | 115 | 18 (15.7) | 408 | 47 (11.5) | 0.2354 |
| Muscle and/or ligament sprain | 115 | 12 (10.4) | 408 | 36 (8.8) | 0.5971 |
| Osteoporosis | 115 | 15 (13.0) | 408 | 25 (6.1) | **0.0137** |
| Spondylolisthesis | 115 | 3 (2.6) | 408 | 30 (7.4) | 0.0807 |
| Autoimmune inflammatory disease | 115 | 5 (4.3) | 408 | 26 (6.4) | 0.4167 |
| Stenosis | 115 | 3 (2.6) | 408 | 14 (3.4) | 1.0000 |
| Spinal fracture or dislocation | 115 | 4 (3.5) | 408 | 11 (2.7) | 0.7510 |
| Chronic Pain | 115 | 2 (1.7) | 408 | 6 (1.5) | 0.6901 |
| Neurological disease | 115 | 1 (0.9) | 408 | 5 (1.2) | 1.0000 |
| Osteoporosis with spinal fracture | 115 | 1 (0.9) | 408 | 5 (1.2) | 1.0000 |
| Other vertebral problem | 115 | 1 (0.9) | 408 | 9 (2.2) | 0.6989 |
| Other lumbar problem | 115 | 2 (1.7) | 408 | 6 (1.5) | 0.6901 |
| Other osteoarthritis | 115 | 4 (3.5) | 408 | 5 (1.2) | 0.1123 |
| Other diagnosis | 115 | 11 (9.6) | 408 | 30 (7.4) | 0.4356 |
| Frequency of use of pain medication |  |  |  |  |  |
| Several times a day | 108 | 23 (21.3) | 408 | 135 (33.1) | 0.1919 |
| Every day |  | 40 (37.0) |  | 121 (29.7) |  |
| Several times a week |  | 12 (11.1) |  | 58 (14.2) |  |
| Once a week |  | 3 (2.8) |  | 8 (2.0) |  |
| Several times a month |  | 12 (11.1) |  | 25 (6.1) |  |
| Once a month |  | 5 (4.6) |  | 12 (2.9) |  |
| One to several times a year |  | 7 (6.5) |  | 26 (6.4) |  |
| Never |  | 6 (5.6) |  | 23 (5.6) |  |
| Management of pain (excluding pain medication) |  |  |  |  |  |
| Massage-therapy sessions | 106 | 43 (40.6) | 408 | 162 (39.7) | 0.8720 |
| Cortisone infiltration | 106 | 38 (35.8) | 408 | 148 (36.3) | 0.9353 |
| Physiotherapy sessions | 106 | 34 (32.1) | 408 | 137 (33.6) | 0.7698 |
| Osteopathy sessions | 106 | 31 (29.2) | 408 | 100 (24.5) | 0.3189 |
| Stretching sessions | 106 | 20 (18.9) | 408 | 73 (17.9) | 0.8161 |
| Use of medical marijuana | 106 | 16 (15.1) | 408 | 67 (16.4) | 0.7408 |
| Yoga sessions | 106 | 18 (17.0) | 408 | 59 (14.5) | 0.5171 |
| Acupuncture sessions | 106 | 18 (17.0) | 408 | 50 (12.3) | 0.2007 |
| Chiropractic sessions | 106 | 12 (11.3) | 408 | 55 (13.5) | 0.5563 |
| Endurance activities (aerobics) | 106 | 7 (6.6) | 408 | 59 (14.5) | **0.0312** |
| Psychotherapy sessions | 106 | 14 (13.2) | 408 | 42 (10.3) | 0.3911 |
| Strength training | 106 | 10 (9.4) | 408 | 44 (10.8) | 0.6862 |
| Rest, relaxation, meditation | 106 | 6 (5.7) | 408 | 43 (10.5) | 0.1275 |
| Homeopathic products | 106 | 9 (8.5) | 408 | 30 (7.4) | 0.6935 |
| Other treatment | 106 | 5 (4.7) | 408 | 24 (5.9) | 0.6432 |
| Stretching and strengthening exercises | 106 | 3 (2.8) | 408 | 22 (5.4) | 0.4452 |
| Occupational-therapy sessions | 106 | 5 (4.7) | 408 | 22 (5.4) | 0.7813 |
| Cupping-therapy sessions | 106 | 2 (1.9) | 408 | 11 (2.7) | 1.0000 |
| Reflexology sessions | 106 | 3 (2.8) | 408 | 10 (2.5) | 0.7365 |
| TENS, vibration | 106 | 1 (0.9) | 408 | 10 (2.5) | 0.4742 |
| Body-mind activities other than yoga | 106 | 0 (0) | 408 | 8 (2.0) | 0.3711 |
| Physical therapy | 106 | 3 (2.8) | 408 | 5 (1.2) | 0.2157 |
| Infrared-therapy sessions | 106 | 0 (0) | 408 | 7 (1.7) | 0.3540 |
| Other | 106 | 2 (1.9) | 408 | 13 (3.2) | 0.7467 |
| Insurance |  |  |  |  |  |
| RAMQ (health-insurance card) | 100 | 40 (40.0) | 408 | 159 (39.0) | 0.9816 |
| Private insurance |  | 50 (50.0) |  | 208 (51.0) |  |
| No insurance |  | 10 (10.0) |  | 41 (10.0) |  |
| Self-reported problems affecting HRQoL | 99 | 67 (67.7) | 408 | 278 (68.1) | 0.9298 |
| Pain | 97 | 56 (57.7) | 408 | 251 (61.5) | 0.4922 |
| Fatigue | 97 | 51 (52.6) | 408 | 209 (51.2) | 0.8108 |
| Insomnia | 97 | 48 (49.5) | 408 | 159 (39.0) | 0.0584 |
| Anxiety/stress | 97 | 43 (44.3) | 408 | 155 (38.0) | 0.2503 |
| Depression | 97 | 22 (22.7) | 408 | 101 (24.8) | 0.6688 |
| Other mental disorder | 97 | 7 (7.2) | 408 | 20 (4.9) | 0.3624 |
| Osteoarthritis | 97 | 41 (42.3) | 408 | 181 (44.4) | 0.7087 |
| Arthritis | 97 | 14 (14.4) | 408 | 45 (11) | 0.3482 |
| Unintentional injury | 97 | 6 (6.2) | 408 | 18 (4.4) | 0.4605 |
| Other musculoskeletal disorder | 97 | 29 (29.9) | 408 | 112 (27.5) | 0.6293 |
| Neurological disease | 97 | 10 (10.3) | 408 | 37 (9.1) | 0.7054 |
| Thyroid disorder | 97 | 13 (13.4) | 408 | 52 (12.7) | 0.8621 |
| Other endocrine problem | 97 | 1 (1.0) | 408 | 17 (4.2) | 0.2195 |
| Urogenital disorder | 97 | 3 (3.1) | 408 | 33 (8.1) | 0.1215 |
| High blood pressure | 97 | 28 (28.9) | 408 | 97 (23.8) | 0.2963 |
| Heart disease | 97 | 5 (5.2) | 408 | 19 (4.7) | 0.8359 |
| Digestion disorder | 97 | 18 (18.6) | 408 | 79 (19.4) | 0.8563 |
| Other gastrointestinal problem | 97 | 14 (14.4) | 408 | 68 (16.7) | 0.5918 |
| Diabetes | 97 | 14 (14.4) | 408 | 59 (14.5) | 0.9944 |
| Cancer | 97 | 4 (4.1) | 408 | 10 (2.5) | 0.3215 |
| Other respiratory disorder | 97 | 14 (14.4) | 408 | 49 (12) | 0.5162 |
| Migraines, headache | 97 | 0 (0) | 408 | 16 (3.9) | 0.0509 |
| Stroke | 97 | 3 (3.1) | 408 | 2 (0.5) | 0.0511 |
| Metabolic problem | 97 | 2 (2.1) | 408 | 7 (1.7) | 0.6854 |
| Chronic obstructive pulmonary disease | 97 | 3 (3.1) | 408 | 5 (1.2) | 0.1845 |
| ORL | 97 | 1 (1.0) | 408 | 5 (1.2) | 1.0000 |
| Other | 97 | 3 (3.1) | 408 | 14 (3.4) | 1.0000 |
| Health status |  |  |  |  |  |
| Excellent/Very good | 97 | 9 (9.3) | 408 | 51 (12.5) | 0.6793 |
| Good |  | 34 (35.1) |  | 153 (37.5) |  |
| Fair |  | 39 (40.2) |  | 141 (34.6) |  |
| Poor |  | 15 (15.5) |  | 63 (15.4) |  |
| Satisfaction on his/her health |  |  |  |  |  |
| 0-3 | 97 | 35 (36.1) | 408 | 175 (42.9) | 0.2004 |
| 4-6 |  | 39 (40.2) |  | 166 (40.7) |  |
| 7-10 |  | 23 (23.7) |  | 67 (16.4) |  |
| Satisfaction on his/her life |  |  |  |  |  |
| 0-3 | 96 | 20 (20.8) | 408 | 100 (24.5) | 0.7447 |
| 4-6 |  | 38 (39.6) |  | 152 (37.3) |  |
| 7-10 |  | 38 (39.6) |  | 156 (38.2) |  |
| Willingness to take risks |  |  |  |  |  |
| 0-3 | 96 | 39 (40.6) | 408 | 151 (37.0) | 0.5729 |
| 4-6 |  | 41 (42.7) |  | 170 (41.7) |  |
| 7-10 |  | 16 (16.7) |  | 87 (21.3) |  |

Note: values in bold indicate at statistical significance at p<0.05.

**Supplementary Table 2. Descriptive statistics for Oswestry Disability Index**

| Oswestry | Mean (SD) | 0 | 1 | 2 | 3 | 4 | 5 |
| --- | --- | --- | --- | --- | --- | --- | --- |
| Pain intensity | 2.24 (0.93) | 3.0% | 14.6% | 48.5% | 23.8% | 10.2% | 0% |
| Personal hygiene | 1.14 (1.14) | 38.6% | 23.0% | 28.0% | 6.9% | 2.7% | 0.7% |
| Lifting | 2.85 (1.13) | 2.5% | 12.4% | 16.1% | 39.1% | 26.2% | 3.7% |
| Walking | 1.83 (1.30) | 16.6% | 29.2% | 22.0% | 21.3% | 8.9% | 2.0% |
| Sitting | 2.07 (1.14) | 8.9% | 21.0% | 35.2% | 26.0% | 6.4% | 2.5% |
| Standing | 2.57 (1.28) | 4.5% | 20.3% | 19.6% | 29.7% | 21.0% | 5.0% |
| Sleeping | 1.77 (1.07) | 4.5% | 45.8% | 28.0% | 15.1% | 4.0% | 2.7% |
| Sex life (if applicable) | 2.60 (1.62) | 13.6% | 18.8% | 8.7% | 22.8% | 25.0% | 11.1% |
| Social life | 2.82 (1.22) | 5.9% | 8.9% | 14.6% | 46.0% | 16.8% | 7.7% |
| Travelling | 1.95 (1.19) | 9.2% | 31.2% | 27.7% | 21.8% | 7.9% | 2.2% |

SD: Standard deviation

**Supplementary Table 3. Univariate and multivariate linear regression models to predict EQ-5D-5L**

|  | **Model 1** | **Model 2** | **Model 3** |
| --- | --- | --- | --- |
|  | **Estimate (SE)** | **Estimate (SE)** | **Estimate (SE)** |
| **Oswestry for each section** | **R2 = 0.643** | **R2 = 0.660** | **R2 = 0.695** |
| **RMSE = 0.148** | **RMSE = 0.145** | **RMSE = 0.137** |
| Intercept | -0.9443 (0.0279) *** | -0.4615 (0.2091) * | -0.2674 (0.2011) |
| Oswestry |  |  |  |
| Pain intensity | 0.0667 (0.0103) *** | 0.0647 (0.0102) *** | 0.0528 (0.0115) *** |
| Personal care (washing, dressing etc) | 0.0221 (0.0082) ** | 0.0166 (0.0081) * | 0.0156 (0.0078) * |
| Lifting | 0.0044 (0.0074) | 0.0104 (0.0074) | 0.0063 (0.0071) |
| Walking | 0.033 (0.0077) *** | 0.0337 (0.0076) *** | 0.0340 (0.0073) *** |
| Sitting | 0.0037 (0.0076) | 0.0004 (0.0076) | 0.0027 (0.0073) |
| Standing | 0.0119 (0.0069) ׀ | 0.0133 (0.0068) ׀ | 0.0115 (0.0065) ׀ |
| Sleeping | 0.0216 (0.0081) ** | 0.0211 (0.0079) ** | 0.0139 (0.0076) ׀ |
| Sex life (if applicable) | 0.0166 (0.006) ** | 0.017 (0.0059) ** | 0.0133 (0.0057) * |
| Social life | 0.0443 (0.008) *** | 0.0397 (0.008) *** | 0.0277 (0.0078) *** |
| Travelling | 0.016 (0.0081) * | 0.0177 (0.008) * | 0.0159 (0.0077) * |
| Age (years) |  | -0.0013 (0.0006) * | -0.0006 (0.0006) |
| Women |  | -0.0385 (0.0184) * | -0.0312 (0.0176) ׀ |
| Time LBP (> 1 years vs 3 months to 1 years) |  | -0.0866 (0.0528) | -0.1041 (0.0504) * |
| Invalid |  | 0.0593 (0.0214) ** | 0.0512 (0.0204) * |
| Health satisfaction (0-10 cm) |  |  | -0.0116 (0.0038) ** |
| Life satisfaction (0-10 cm) |  |  | -0.0127 (0.0039) ** |
| Intensity of pain today (0-10 cm) |  |  | 0.0062 (0.0048) |
| **Roland-Morris items** | **R2=0.453** | **R2=0.474** | **R2=0.601** |
| **RMSE=0.183** | **RMSE=0.18** | **RMSE=0.157** |
| Intercept | -0.6742 (0.0193) *** | -0.1234 (0.2615) | 0.073 (0.2299) |
| Roland Morris Disability Questionnaire |  |  |  |
| Because of back pain… |  |  |  |
| 1. Stay at home most of the time | 0.0783 (0.0232) *** | 0.0668 (0.0234) ** | 0.0632 (0.0205) ** |
| 4. Not doing any jobs that I usually do around the house | 0.0867 (0.0268) ** | 0.0976 (0.0265) *** | 0.0512 (0.0237) * |
| 7. Hold on to something to get out of an easy chair | 0.0373 (0.0226) ׀ | 0.0332 (0.0223) | 0.0375 (0.0195) ׀ |
| 12. Difficult to get out of a chair | 0.0581 (0.0233) * | 0.0634 (0.0231) ** | 0.0471 (0.0203) * |
| 13. Painful almost all of the time | 0.0940 (0.0221) *** | 0.0919 (0.022) *** | 0.0483 (0.0202) * |
| 17. Can only walk short distances | 0.1001 (0.0211) *** | 0.1044 (0.0212) *** | 0.0777 (0.0187) *** |
| 20. Sit down for most of the day | 0.0465 (0.0244) ׀ | 0.0487 (0.024) * | 0.0223 (0.0213) |
| 22. More irritable and bad tempered with people than usual | 0.0475 (0.0197) * | 0.038 (0.0199) ׀ | 0.0101 (0.0177) |
| 23. Go upstairs more slowly than usual | 0.0377 (0.0212) ׀ | 0.0308 (0.021) | 0.0069 (0.0185) |
| 24. Stay in bed most of the time | 0.0976 (0.0350) ** | 0.0702 (0.0355) * | 0.0561 (0.0311) ׀ |
| Age (years) |  | -0.0005 (0.0008) | -0.0003 (0.0007) |
| Women |  | -0.0344 (0.0235) | -0.0317 (0.0207) |
| Time LBP (> 1 years vs 3 months to 1 years) |  | -0.1161 (0.0661) ׀ | -0.1431 (0.0579) * |
| Invalid |  | 0.0824 (0.0273) ** | 0.0584 (0.024) * |
| Health satisfaction (0-10 cm) |  |  | -0.0154 (0.0044) *** |
| Life satisfaction (0-10 cm) |  |  | -0.0184 (0.0044) *** |
| Intensity of pain today (0-10 cm) |  |  | 0.0271 (0.0046) *** |

SE: Standard error, RMSE: Root-mean-square deviation, R2: R-squared, LBP: Low back pain, Models for Roland-Morris items: only items with p<0.1 in model 1 were selected. ׀ 0.05<p<0.1, * p<0.05, **p<0.01, ***p<0.001

**Supplementary Table 4. Univariate and multivariate linear regression models to predict EQ-VAS**

|  | **Modèle 1** | **Modèle 2** | **Modèle 3** |
| --- | --- | --- | --- |
|  | **Estimate (SE)** | **Estimate (SE)** | **Estimate (SE)** |
| **Oswestry Disability Index Score** | **R2=0.276** | **R2=0.303** | **R2=0.398** |
| **RMSE=17.405** | **RMSE=17.045** | **RMSE=15.900** |
| Intercept | 84.79 (2.56) *** | 87.47 (24.46) *** | 61.99 (23.07) ** |
| Oswestry | -0.68 (0.06) *** | -0.67 (0.06) *** | -0.42 (0.07) *** |
| Age (years) |  | 0.22 (0.07) ** | 0.12 (0.07) ׀ |
| Women |  | 4.52 (2.15) * | 3.86 (2.03) ׀ |
| Time LBP (> 1 years vs 3 months to 1 years) |  | -5.82 (6.16) | -2.91 (5.78) |
| Invalid |  | 2.51 (2.53) | 3.27 (2.36) |
| Health satisfaction (0-10 cm) |  |  | 2.19 (0.44) *** |
| Life satisfaction (0-10 cm) |  |  | 0.93 (0.44) * |
| Intensity of pain today (0-10 cm) |  |  | -0.88 (0.48) ׀ |
| **Oswestry for each section** | **R2=0.316** | **R2=0.336** | **R2=0.420** |
| **RMSE=17.118** | **RMSE=16.830** | **RMSE=15.794** |
| Intercept | 88.57 (3.24) *** | 84.69 (24.35) *** | 62.59 (23.12) ** |
| Oswestry Disability Index |  |  |  |
| Pain intensity | -6.17 (1.19) *** | -5.69 (1.19) *** | -5.08 (1.33) *** |
| Personal care (washing. dressing etc) | -1.01 (0.94) | -0.37 (0.95) | -0.40 (0.89) |
| Lifting | -0.86 (0.86) | -1.52 (0.87) ׀ | -0.94 (0.82) |
| Walking | -0.10 (0.89) | -0.39 (0.89) | -0.38 (0.83) |
| Sitting | -0.17 (0.89) | 0.35 (0.89) | -0.07 (0.84) |
| Standing | -1.56 (0.80) ׀ | -1.80 (0.79) * | -1.55 (0.74) * |
| Sleeping | -2.07 (0.94) * | -1.87 (0.93) * | -0.87 (0.88) |
| Sex life (if applicable) | -1.32 (0.70) ׀ | -1.63 (0.69) * | -1.23 (0.66) ׀ |
| Social life | -1.69 (0.93) ׀ | -1.32 (0.93) | 0.12 (0.90) |
| Travelling | 0.19 (0.94) | -0.07 (0.94) | 0.15 (0.88) |
| Age (years) |  | 0.25 (0.07) *** | 0.12 (0.07) |
| Women |  | 4.14 (2.14) ׀ | 3.33 (2.03) |
| Time LBP (> 1 years vs 3 months to 1 years) |  | -4.35 (6.15) | -2.75 (5.80) |
| Invalid |  | 2.18 (2.52) | 2.69 (2.37) |
| Health satisfaction (0-10 cm) |  |  | 2.15 (0.44) *** |
| Life satisfaction (0-10 cm) |  |  | 1.02 (0.45) * |
| Intensity of pain today (0-10 cm) |  |  | -0.02 (0.56) |
| **Roland Morris Disability Questionnaire** | **R2=0.204** | **R2=0.222** | **R2=0.369** |
| **RMSE=18.280** | **RMSE=18.030** | **RMSE=16.290** |
| Intercept | 73.25 (2.02) *** | 69.53 (25.84) ** | 47.57 (23.46) * |
| Rolland-Morris | -1.75 (0.17) *** | -1.71 (0.18) *** | -0.85 (0.19) *** |
| Age (years) |  | 0.15 (0.08) * | 0.09 (0.07) |
| Women |  | 3.97 (2.30) ׀ | 3.66 (2.1) ׀ |
| Time LBP (> 1 years vs 3 months to 1 years) |  | -3.09 (6.55) | -0.69 (5.93) |
| Invalid |  | 1.56 (2.70) | 2.93 (2.45) |
| Health satisfaction (0-10 cm) |  |  | 2.2 (0.45) *** |
| Life satisfaction (0-10 cm) |  |  | 1.29 (0.45) ** |
| Intensity of pain today (0-10 cm) |  |  | -1.61 (0.46) *** |
| **Roland-Morris items** | **R2=0.250** | **R2=0.262** | **R2=0.390** |
| **RMSE=17.875** | **RMSE=17.695** | **RMSE=16.144** |
| Intercept | 71.99 (1.9) *** | 59.51 (25.51) * | 44.44 (23.36) ׀ |
| Roland Morris Disability Questionnaire |  |  |  |
| 1. Stay at home most of the time | -5.00 (2.18) * | -4.76 (2.23) * | -3.98 (2.04) ׀ |
| 4. Not doing any jobs usually do around the house | -6.96 (2.51) ** | -7.23 (2.49) ** | -3.75 (2.34) |
| 13. Painful almost all of the time | -6.73 (2.18) ** | -6.62 (2.18) ** | -3.59 (2.08) ׀ |
| 14. Difficult to turn over in bed | -5.15 (1.96) ** | -4.79 (1.95) * | -3.46 (1.80) ׀ |
| 18. I sleep less well | -4.42 (1.96) * | -3.89 (1.96) * | -1.74 (1.81) |
| 20. Sit down for most of the day | -6.36 (2.38) ** | -6.59 (2.36) ** | -3.57 (2.19) |
| 23. Go upstairs more slowly than usual | -4.76 (1.95) * | -4.47 (1.96) * | -1.82 (1.81) |
| Age (years) |  | 0.14 (0.08) ׀ | 0.07 (0.07) |
| Women |  | 3.64 (2.29) | 3.25 (2.11) |
| Time LBP (> 1 years vs 3 months to 1 years) |  | -0.60 (6.49) | 0.36 (5.92) |
| Invalid |  | 1.51 (2.69) | 3.12 (2.46) |
| Health satisfaction (0-10 cm) |  |  | 2.19 (0.45) *** |
| Life satisfaction (0-10 cm) |  |  | 1.19 (0.45) ** |
| Intensity of pain today (0-10 cm) |  |  | -1.31 (0.48) ** |

SE: Standard error, RMSE: Root-mean-square deviation, R2: R-squared, LBP: Low back pain. Models for Roland-Morris items: only items with p<0.1 in model 1 were selected. ׀ 0.05<p<0.1, * p<0.05, **p<0.01, ***p<0.001
